# Supplementary material for: Subatomic resolution X-ray structures of green fluorescent protein
Source: PubMed Central journal article supplement (PMC6503917; doi:10.1107/s205225251900246x), 2019-04-03
Supplement: m-06-00387-sup1.pdf [file m-06-00387-sup1.pdf]

# IUCrJ

**Volume 6 (2019)**

**Supporting information for article:**

**Sub-atomic X-ray structures of green fluorescent protein**

**Kiyofumi Takaba, Yang Tai, Haruhiko Eki, Hoang-Anh Dao, Yuya Hanazono, Kazuya Hasegawa, Kunio Miki and Kazuki Takeda**

Supporting Information for  
**Sub-atomic X-ray structures of green fluorescent protein**

Kiyofumi Takaba<sup>1</sup>, Yang Tai<sup>1</sup>, Haruhiko Eki<sup>1</sup>, Hoang-Anh Dao<sup>1</sup>, Yuya Hanazono<sup>1</sup>, Kazuya Hasegawa<sup>2</sup>, Kunio Miki<sup>1</sup>, Kazuki Takeda<sup>1\*</sup>

<sup>1</sup>Department of Chemistry, Graduate School of Science, Kyoto University, Sakyo-ku, Kyoto 606-8502, Japan

<sup>2</sup>Protein Crystal Analysis Division, Japan Synchrotron Radiation Research Institute (JASRI), 1-1-1 Kouto, Sayo-cho, Sayo-gun, Hyogo 679-5198, Japan

\*Corresponding author. Email: ktakeda@kuchem.kyoto-u.ac.jp

**This file includes:**

Figure S1 to S7

Table S1 to S5

**Two additional electronic files used for the initial refinement stage are also attached as supplement.**

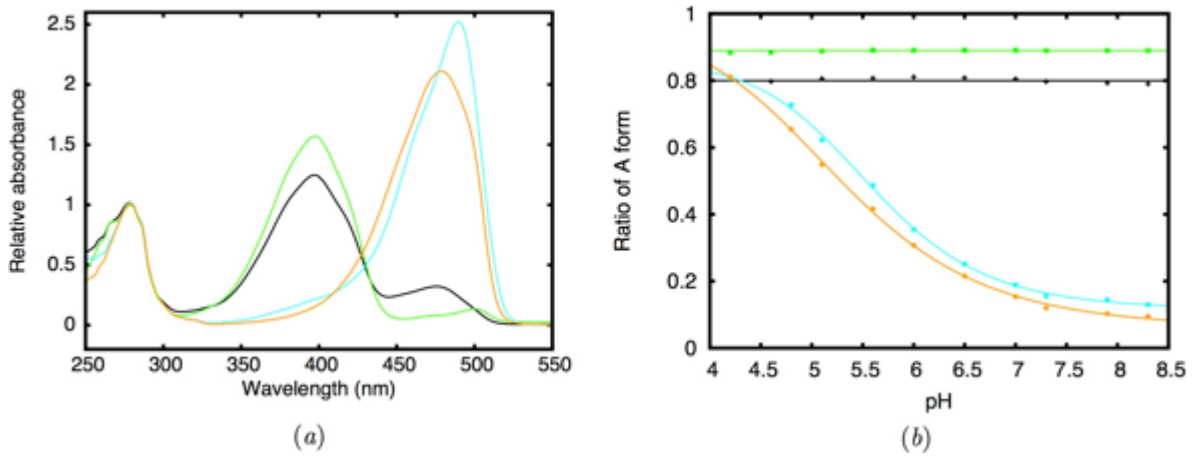

**Figure S1**

Absorption spectra of GFP variants. (a) Absorption spectra of GFP variants at pH 8.5 (black: WT; green: T203I; cyan: S65T; yellow: E222Q). (b) Population ratios of the A form at different pH. They were calculated as reported previously (Wiehler *et al.*, 2003). The pKa values from the change of the population in the two anionic variants are 5.58 (S65T) and 5.27 (E222Q), respectively.

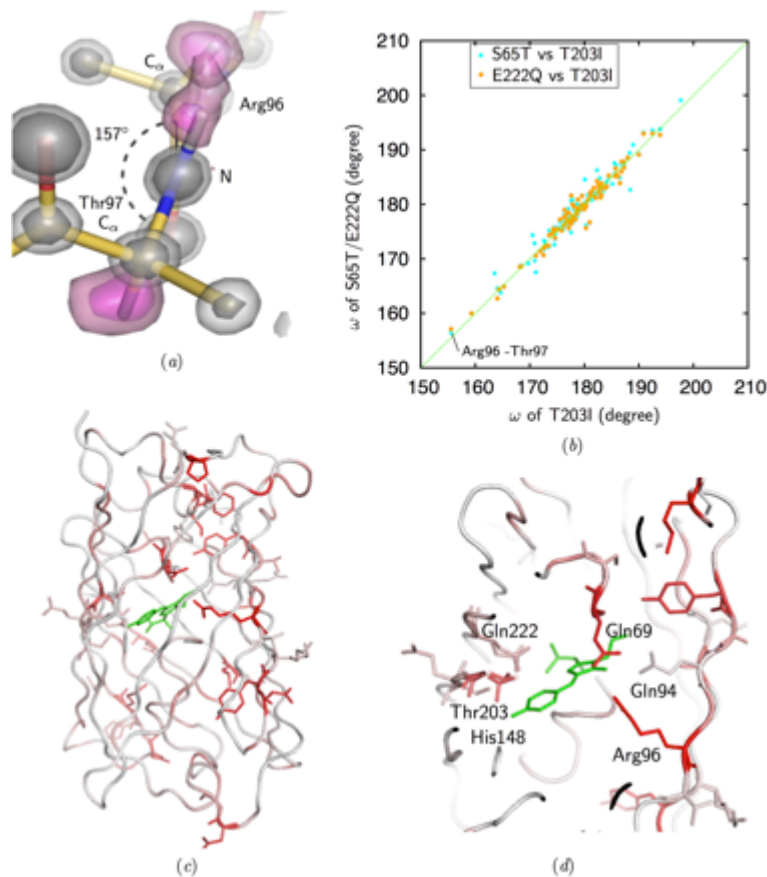

**Figure S2**

Peptide-bond distortions of GFP. (a) Distortion of the peptide bond of Arg96-Thr97 with an  $\omega$  angle of 157°. The  $2F_o-F_c$  map contoured at  $4\sigma$  and  $6\sigma$  and the  $F_o-F_c$  omit map for H-atoms contoured at  $2\sigma$  and  $3\sigma$  are shown in grays and pinks, respectively. (b) Relationships of the distortion angle of each residue between the variants. The values for the T203I variant are along the fast axis and those of S65T (cyan) and E222Q (yellow) are plotted. The residues whose occupancy of the main conformation is less than 0.7 are ignored. (c) Overall structure of the GFP E222Q variant colored by the distortion of peptide bonds. The models are colored according to the absolute values of torsion angles ( $\omega$ :  $C_\alpha-C-N^{\prime}-C_\alpha^{\prime}$ ) from 160° (red) to 180° (white). The highly-distorted residues and the residues interacting with the chromophore are shown in a stick model with side-chains. The chromophore is highlighted in green. (d) Close-up view around the chromophore.

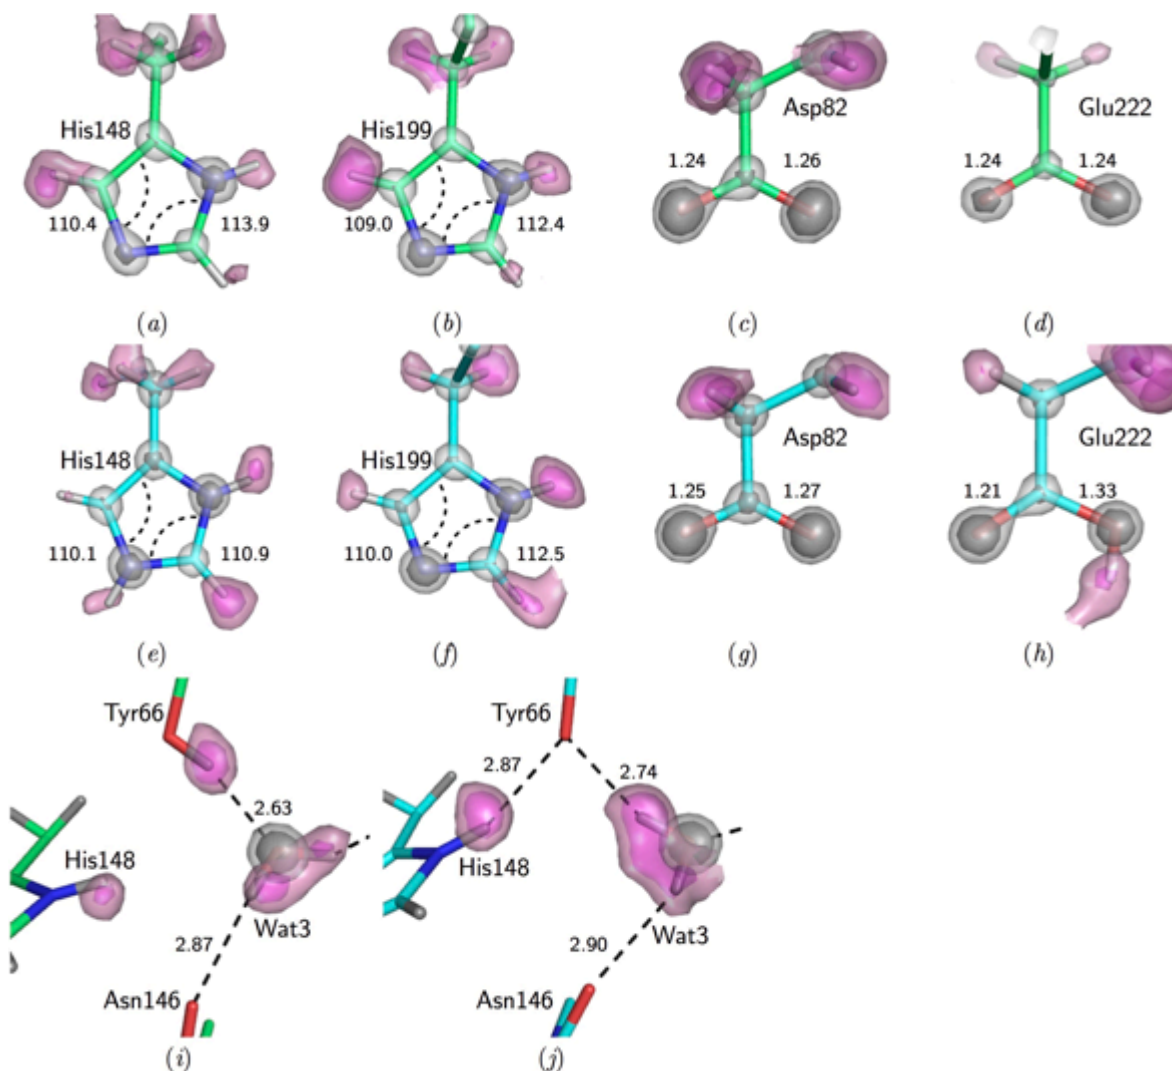

**Figure S3**

H-atom positions and geometry of dissociable residues and H-bonds around  $O_{\eta}$ . (a-h) Electron density of H-atoms at His148 for the T203I variant (a), at His199 for the T203I variant (b), at Asp82 for the T203I variant (c), at Glu222 for the T203I variant (d), at His148 for the S65T variant (e), at His199 for the S65T variant (f), at Asp82 for the S65T variant (g) and at Glu222 for the S65T variant (h). The values are bond angles of  $C_{\gamma}-C_{\delta 2}-N_{\epsilon 2}$  and  $N_{\epsilon 2}-C_{\epsilon 1}-N_{\delta 1}$  of His and lengths of  $C_{\gamma}/C_{\epsilon}-O_{\delta 1}/O_{\epsilon 1}$  and  $C_{\gamma}/C_{\epsilon}-O_{\delta 2}/O_{\epsilon 2}$  of Asp/Glu. These visualized protonation state are consistent with the difference in the bond angles and lengths (Fisher *et al.*, 2012). (i, j) Close-up view of H-bonds around His148-Wat3 for T203I (i) and around

His148-Wat3 for S65T (*j*). The  $2F_o-F_c$  map for Wat3 contoured at  $4\sigma$  and  $6\sigma$  and the  $F_o-F_c$  omit map for H-atoms contoured at  $2\sigma$  and  $3\sigma$  are shown in grays and pinks, respectively. H-bonds are represented as broken lines, with the distances between the donor and the acceptor shown in angstroms.

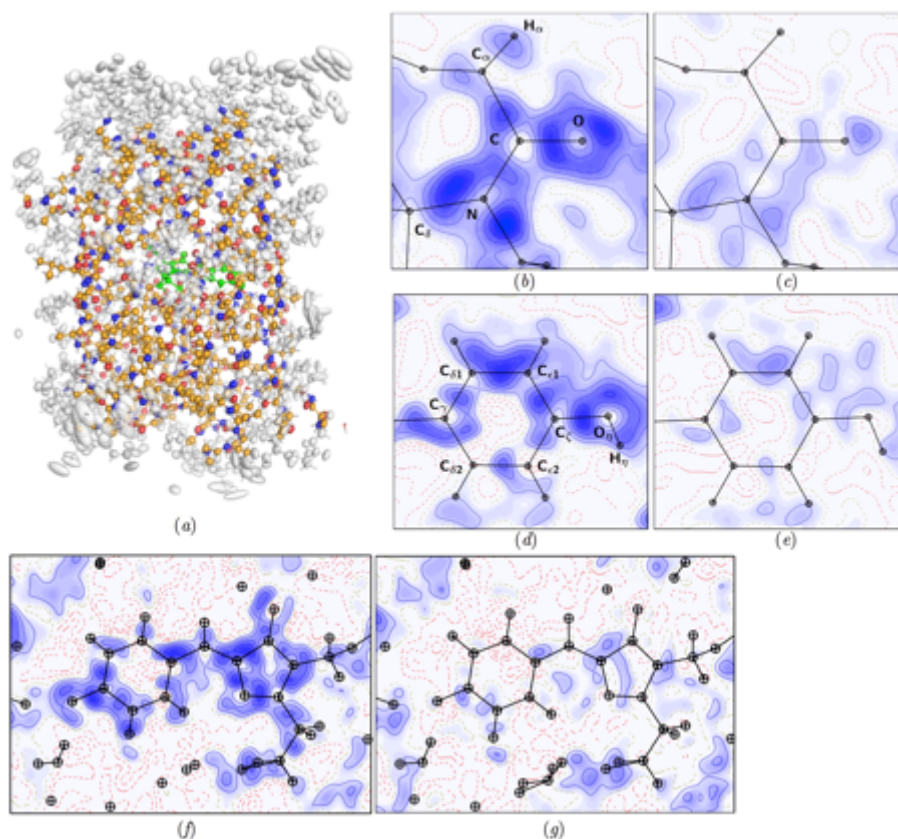

**Figure S4**

MAM of the E222Q GFP. (a) A ball and stick model of the whole GFP. Atoms refined with MAM are colored, while the other fixed atoms are shown in gray. (b) The residual density in a slice of the peptide plane between Trp57-Pro58 after ISAM refinement. (c) The residual density in a slice of the peptide plane between Trp57 and Pro58 after MAM refinement. (d) The residual density in a slice of the phenolic plane of Tyr106 after ISAM refinement. (e) The residual density in a slice of the phenolic plane of Tyr106 after MAM refinement. (f) The residual density in a slice of the chromophore plane after ISAM refinement. (g) The residual density in a slice of the chromophore plane after MAM refinement. The contour intervals are  $0.05 \text{ e}/\text{\AA}^3$ . Positive: blue lines; negative: red broken lines. The intervals are only colored in blue.

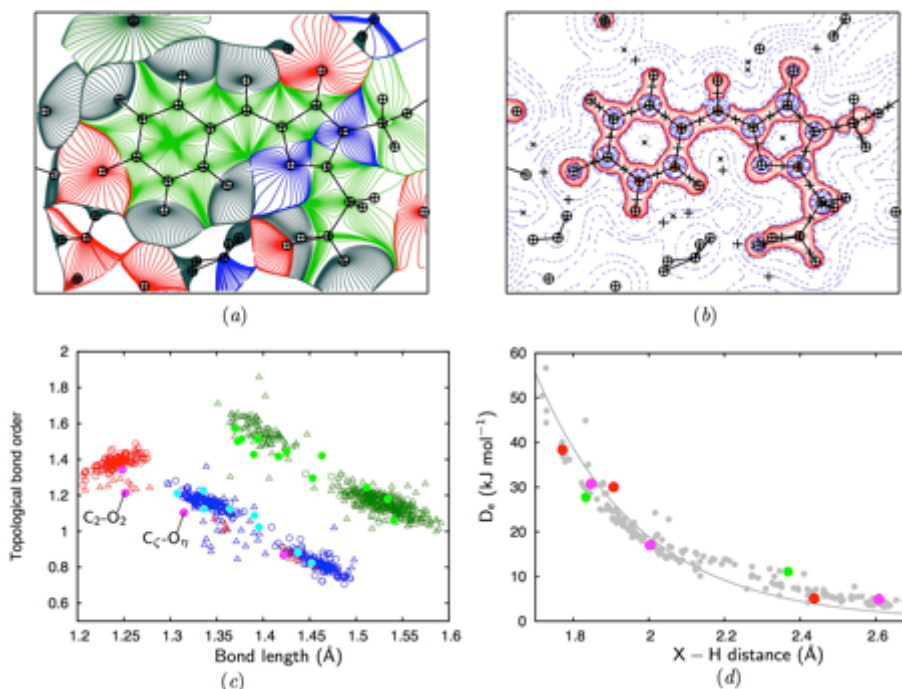

**Figure S5**

Topological analysis based on the electron density of MAM. (a) The gradient vector field around the chromophore. Atoms and vector lines are colored green for carbon, blue for nitrogen, red for oxygen and dark-green for hydrogen. (b) The Laplacian  $\nabla^2\rho$  map around the chromophore. The view is the same as in Fig 6a. The contour interval is  $0.05 \text{ e } \text{\AA}^{-5}$ . Red solid and blue dashed lines represent negative and positive levels, respectively. The BCPs and the ring critical points (RCP) are represented as “+” and “x”, respectively. (c) Bond lengths and orders (Tsirelson *et al.*, 2007) for covalent bonds. Filled circles in bright-green, cyan and magenta are for C–C, C–N and C–O bonds of the chromophore, respectively. Empty circles and triangles indicate bonds of the main-chain and side-chain in a selected region for MAM. Those in green, blue and red are presented in the same manner as the chromophore bonds. (d) X (Acceptor)–H distances and dissociation energies for H-bonds. A relationship derived from small molecules is overlaid as a solid curve in gray (Espinosa & Molins, 2000). Filled circles in red, magenta and green are for  $\text{XH}\cdots\text{O}_\eta$ ,  $\text{XH}\cdots\text{O}_2$  and other H-bonds with chromophore, respectively. Small gray circles represent the H-bonds in the other portion of the selected region for MAM.



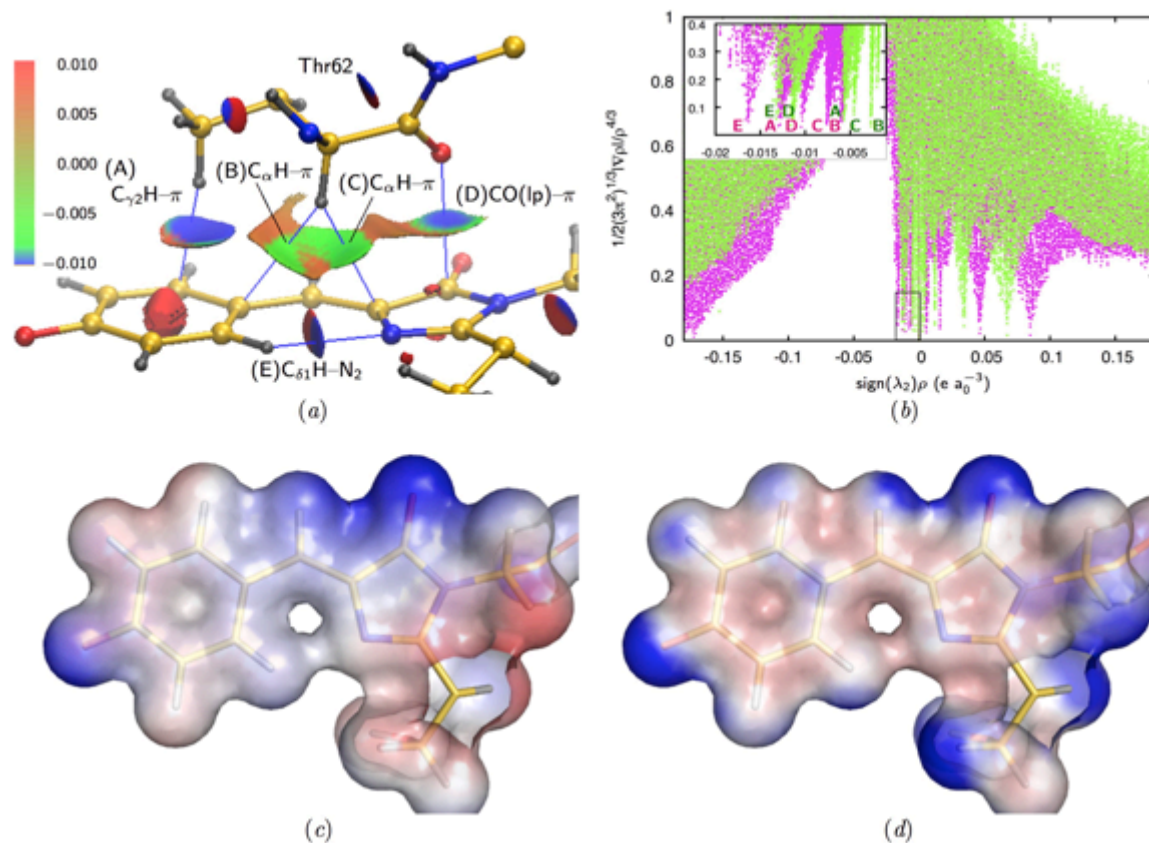

**Figure S6**

Non-covalent interactions on the chromophore surface. (a) Non-covalent interaction surfaces over the chromophore derived from the ISAM electron density. The reduced density gradient,  $s(\rho) = 0.4$  isosurface is colored according to a blue-green-red scale over the range  $-0.01 < sign(\lambda_2)\rho < 0.01 e a_0^{-3}$ . Blue indicates attraction, green indicates very weak attraction and red indicates repulsion. The “lp” is abbreviation of the “lone pair”. (b) Plots of the reduced density gradient versus the electron density multiplied by the sign of the second Hessian eigenvalue for ISAM (magenta) and MAM (green). (Inset) Details of the boxed region describing the attractive interactions. The letters, A–E, identify the corresponding interactions for each spikes. (c) Electrostatic potentials on the chromophore surface derived from surrounding residues of the MAM. (d) Electrostatic potentials on the chromophore surface derived from the ISAM. The surface is colored using a blue-white-red scale.



**Table S1**

Data collection and crystallographic statistics for datasets for the radiation damage assessment.

| Temperature (K) | Data# | Dose (MGy)        | Cell dimensions<br><i>a, b, c</i> (Å) | $I/\sigma(I)$ | $R_{\text{merge}}^{\ddagger}$ (%) | CC <sub>1/2</sub> (%) | Wilson <i>B</i> (Å <sup>2</sup> ) |
|-----------------|-------|-------------------|---------------------------------------|---------------|-----------------------------------|-----------------------|-----------------------------------|
| 50              | 1-1   | $2.0 \times 10^4$ | 50.88, 62.34, 69.08                   | 0.88          | 95.9                              | 55.1                  | 11.68                             |
|                 | 1-2   | $4.0 \times 10^4$ | 50.88, 62.34, 69.08                   | 0.89          | 95.4                              | 54.8                  | 11.70                             |
|                 | 1-3   | $6.0 \times 10^4$ | 50.88, 62.34, 69.08                   | 0.90          | 96.9                              | 57.4                  | 11.70                             |
|                 | 1-4   | $8.0 \times 10^4$ | 50.88, 62.34, 69.08                   | 0.89          | 95.6                              | 53.4                  | 11.67                             |
|                 | 1-5   | $1.0 \times 10^5$ | 50.88, 62.34, 69.08                   | 0.90          | 95.9                              | 54.8                  | 11.68                             |
|                 | 1-6   | $1.2 \times 10^5$ | 50.88, 62.34, 69.08                   | 0.90          | 96.4                              | 55.1                  | 11.70                             |
|                 | 1-7   | $1.4 \times 10^5$ | 50.88, 62.34, 69.08                   | 0.87          | 96.8                              | 54.7                  | 11.68                             |
|                 | 1-8   | $1.6 \times 10^5$ | 50.88, 62.34, 69.08                   | 0.89          | 96.9                              | 55.0                  | 11.71                             |
|                 | 1-9   | $1.8 \times 10^5$ | 50.88, 62.34, 69.08                   | 0.90          | 96.8                              | 53.5                  | 11.70                             |
|                 | 1-10  | $2.0 \times 10^5$ | 50.88, 62.34, 69.08                   | 0.89          | 96.9                              | 55.1                  | 11.69                             |
| 100             | 2-1   | $2.0 \times 10^4$ | 50.88, 62.34, 69.08                   | 0.74          | 106.5                             | 55.1                  | 12.15                             |
|                 | 2-2   | $4.0 \times 10^4$ | 50.88, 62.34, 69.08                   | 0.73          | 105.5                             | 54.8                  | 12.06                             |
|                 | 2-3   | $6.0 \times 10^4$ | 50.88, 62.34, 69.08                   | 0.76          | 104.3                             | 57.4                  | 12.07                             |
|                 | 2-4   | $8.0 \times 10^4$ | 50.88, 62.34, 69.08                   | 0.75          | 104.8                             | 53.4                  | 12.06                             |
|                 | 2-5   | $1.0 \times 10^5$ | 50.88, 62.34, 69.08                   | 0.76          | 104.8                             | 54.8                  | 12.07                             |
|                 | 2-6   | $1.2 \times 10^5$ | 50.88, 62.34, 69.08                   | 0.74          | 105.8                             | 55.1                  | 12.08                             |
|                 | 2-7   | $1.4 \times 10^5$ | 50.88, 62.34, 69.08                   | 0.74          | 105.6                             | 54.7                  | 12.06                             |
|                 | 2-8   | $1.6 \times 10^5$ | 50.88, 62.34, 69.08                   | 0.74          | 106.7                             | 55.0                  | 12.10                             |
|                 | 2-9   | $1.8 \times 10^5$ | 50.88, 62.34, 69.08                   | 0.74          | 106.1                             | 53.5                  | 12.07                             |
|                 | 2-10  | $2.0 \times 10^5$ | 50.88, 62.34, 69.08                   | 0.73          | 106.1                             | 55.1                  | 12.09                             |

<sup>†</sup>The highest resolution shells for all data are 1.27-1.20 Å. The  $I/\sigma(I)$ ,  $R_{\text{merge}}$ , and CC<sub>1/2</sub> values are for the highest resolution shells.

$$^{\ddagger}R_{\text{merge}} = \frac{\sum_{hkl} \sum_i |I_{hkl,i} - \langle I_{hkl} \rangle|}{\sum_{hkl} \sum_i I_{hkl,i}}$$

**Table S2**

Summary of high-resolution GFP or GFP-like crystal structures.

| PDBID        | Form      | Resolution (Å) | Program     | e.s.d (Å) <sup>†</sup> | DPI (Å) <sup>‡</sup> | $\tau$ (°) <sup>§</sup> | $\phi$ (°) <sup>¶</sup> | Mutation                              |
|--------------|-----------|----------------|-------------|------------------------|----------------------|-------------------------|-------------------------|---------------------------------------|
| 4GF6         | A         | 1.1            | Refmac      | -                      | 0.059                | -32.0                   | 18.6                    | F99S/M153T/V163A                      |
| 2AWK         | A         | 1.15           | Shelx       | -                      | 0.059                | 9.3                     | -7.8                    | S65T/F64L/R96M/F99S/M153T/V163A       |
| 3SRY         | A         | 1.16           | Phenix      | -                      | 0.056                | -5.1                    | 15.0                    | S65G/S72A/Q183A/T203Y/H231L           |
| 3ST0         | A         | 1.19           | Phenix      | -                      | 0.066                | 9.0                     | -2.1                    | S65G/Q69T/S72A/K79R/V163A/T203Y/H231L |
| 2QZ0         | A         | 1.2            | Shelx       | -                      | 0.078                | -10.1                   | 11.0                    | F64L/F99S/M153T/V163A/Q183E           |
| 4GES         | A         | 1.23           | Refmac      | -                      | 0.079                | -42.5                   | 25.2                    | F99S/M153T/V163A                      |
| 3DQ7         | A         | 1.23           | Refmac      | -                      | 0.138                | 0.5                     | 8.1                     | S65G/V68L/Q69M/S72A/T203Y/H231L       |
| 3SSH         | A         | 1.28           | Phenix      | -                      | 0.070                | -2.5                    | 12.4                    | S65G/S72A/K79R/Q183A/T203Y/H231L      |
| 3GJ1         | A         | 1.8            | Refmac      | -                      | 0.235                | 7.4                     | 2.8                     | F99S/M153T/V163A/T203H                |
| 2WUR         | ambiguous | 0.9            | Shelx       | -                      | 0.034                | -1.0                    | -1.3                    | F64L/I167T/K238N                      |
| 2FZU         | ambiguous | 1.25           | Shelx       | -                      | 0.072                | 1.1                     | 7.4                     | S65T/F64L/F99S/M153T/V163A            |
| 1GFL         | ambiguous | 1.9            | X-plor      | -                      | 0.300                | 0.5                     | 0.0                     | -                                     |
| 2HQZ         | B         | 1.2            | Shelx       | -                      | 0.057                | 7.4                     | -7.1                    | S65T/L42H/F64L                        |
| 2DUH         | B         | 1.2            | Shelx       | -                      | 0.080                | 4.2                     | -4.4                    | S65T/H148D                            |
| 2DUE         | B         | 1.24           | Shelx       | -                      | 0.075                | 5.7                     | -4.2                    | S65T/H148N                            |
| 2HJO         | B         | 1.25           | Shelx       | -                      | 0.065                | 8.5                     | -7.2                    | S65T/F64L/V224H                       |
| 1EMA         | B         | 1.9            | TNT         | -                      | 0.328                | 17.6                    | -13.0                   | S65T                                  |
| 1EMG         | B         | 2.0            | TNT         | -                      | 0.298                | 4.0                     | -4.2                    | S65T                                  |
| 6JGH (T203I) | A         | 0.94           | Shelx       | 0.012                  | 0.023                | 0.6                     | -5.6                    | F99S/M153T/V163A/T203I                |
| 6JGI (S65T)  | B         | 0.85           | Shelx       | 0.007                  | 0.016                | -0.5                    | -1.9                    | S65T/F99S/M153T/V163A                 |
| 6JGJ (E222Q) | B         | 0.78           | Shelx/MoPro | 0.006/0.007            | 0.015/0.014          | -1.0                    | -0.4                    | F99S/M153T/V163A/E222Q                |

<sup>†</sup>Estimated standard deviations for bond lengths derived from the full-matrix refinement with *SHELXL* or *MoPro*. The average values for the chromophore.<sup>‡</sup>Dispersion Precision Indicator as positional error calculated with the data deposited in PDB as follows:  $\sigma(r, B_{\text{avg}}) = 3^{1/2}(N/p)^{1/2}C^{-1/3}Rd_{\text{min}}$  (Cruickshank, 1999).<sup>§</sup>A dihedral angle (tilt) defined with  $N_2-C_{\alpha 2}-C_{\beta 2}-C_{\gamma}$ .<sup>¶</sup>A dihedral angle (twist) defined with  $C_{\alpha 2}-C_{\beta 2}-C_{\gamma}-C_{\epsilon 1}$ .

**Table S3**

Conditions in theoretical calculations on chromophore geometry.

|                                             | Ref. <sup>†</sup> | Ini <sup>‡</sup> | Residues in QM calculation |        |        |        |        |      |       |                                   |
|---------------------------------------------|-------------------|------------------|----------------------------|--------|--------|--------|--------|------|-------|-----------------------------------|
|                                             |                   |                  | Arg96 <sup>§</sup>         | His148 | Thr203 | Ser205 | Glu222 | Wat3 | Thr62 | Others <sup>  </sup>              |
| <b>With protein environment<sup>¶</sup></b> |                   |                  |                            |        |        |        |        |      |       |                                   |
| <i>Sinicropi et al., 2005</i>               | 1                 | 1GFL             | -                          | -      | -      | -      | -      | ○    | -     | 2 waters                          |
| <i>Altoè et al., 2007</i>                   | 2                 | 1GFL             | -                          | -      | -      | -      | -      | ○    | -     | 2 waters                          |
| <i>Bravaya et al., 2011</i>                 | 3                 | 1EMA             | ○                          | ○      | -      | ○      | ○      | ○    | -     | 1 water                           |
| <i>Amat &amp; Nifosi, 2013</i>              | 4                 | 1EMG             | ○                          | ○      | ○      | ○      | ○      | ○    | ○     | Tyr145, Gln69,<br>Gln94, 3 waters |
| <i>Grigorenko et al., 2013</i>              | 5                 | 1EMA             | -                          | ○      | ○      | ○      | ○      | ○    | -     | -                                 |
| <i>Ding et al., 2013</i>                    | 6                 | 3GJ1             | -                          | -      | -      | -      | ○      | -    | -     | -                                 |
| <i>Beerepoot et al., 2013</i>               | 7                 | 1GFL             | -                          | -      | -      | -      | -      | -    | -     | -                                 |
| <b>Isolated<sup>¶</sup></b>                 |                   |                  |                            |        |        |        |        |      |       |                                   |
| <i>Tozzini &amp; Nifosi, 2001</i>           | 8                 | -                | -                          | -      | -      | -      | -      | -    | -     | -                                 |
| <i>Martin et al., 2004</i>                  | 9                 | -                | -                          | -      | -      | -      | -      | -    | -     | -                                 |
| <i>Altoe et al., 2005</i>                   | 10                | -                | -                          | -      | -      | -      | -      | -    | -     | -                                 |
| <i>Olsen &amp; Smith, 2008</i>              | 11                | -                | -                          | -      | -      | -      | -      | -    | -     | -                                 |
| <i>Filippi et al., 2009</i>                 | 12                | -                | -                          | -      | -      | -      | -      | -    | -     | -                                 |
| <i>Amat &amp; Nifosi, 2013</i>              | 4                 | -                | -                          | -      | -      | -      | -      | -    | -     | -                                 |
| <i>Beerepoot et al., 2013</i>               | 7                 | -                | -                          | -      | -      | -      | -      | -    | -     | -                                 |

<sup>†</sup>Reference numbers correspond with the number in Fig 4.<sup>‡</sup>A PDB-ID for the initial model structure in the optimization. Also refer Table S2.<sup>§</sup>Representative residues considered in the QM region of the calculations are marked with “○”, while the unconsidered are marked with “-”.<sup>||</sup>Uncommon residues in each calculation.<sup>¶</sup>The calculations with and without surrounding residues are classified as “With protein environment” and “Isolated”, respectively. The majority of the protein residues were treated in MD, excluding those listed in the table.

**Table S4**

H-bond distances around the chromophore.

| H-Donor                                            | Acceptor                                           | T203I                  | S65T                  | E222Q                  |
|----------------------------------------------------|----------------------------------------------------|------------------------|-----------------------|------------------------|
|                                                    |                                                    | $d_{D-A}$ (Å)          | $d_{D-A}$ (Å)         | $d_{D-A}$ (Å)          |
| N-Arg168                                           | N $\epsilon_2$ -His148                             | 3.050(70) <sup>†</sup> | 3.157(9)              | 3.150(30) <sup>‡</sup> |
| N $\delta_1$ -His148                               | O $\eta$ -Tyr66                                    | -                      | 2.869(8)              | 2.867(7)               |
| O $\eta$ -Tyr66                                    | Wat3                                               | 2.623(11)              | -                     | -                      |
| Wat3                                               | O $\eta$ -Tyr66                                    | -                      | 2.737(7)              | 2.727(7)               |
| Wat3                                               | O-Asn146                                           | 2.872(11)              | 2.903(7)              | 2.860(7)               |
| Wat3                                               | O $\gamma$ -Ser205                                 | 2.275(11)              | -                     | -                      |
| O $\gamma$ -Ser205                                 | Wat3                                               | -                      | 2.762(7)              | 2.698(6)               |
| O $\gamma$ -Ser205                                 | O $\epsilon_2$ -Glu222                             | 2.609(13) <sup>‡</sup> | -                     | 2.799(8) <sup>‡</sup>  |
| O $\gamma_1$ -Ser65                                | O $\epsilon_1$ -Glu222<br>(O $\epsilon_1$ -Gln222) | 2.661(12) <sup>‡</sup> | -                     | 2.742(7) <sup>‡</sup>  |
| O $\epsilon_1$ -Glu222<br>(N $\epsilon_1$ -Gln222) | O $\gamma_1$ -Ser65                                | -                      | 2.670(6) <sup>‡</sup> | -                      |
| O $\gamma_1$ -Ser65                                | N $_2$ -Tyr66                                      | -                      | 2.740(7)              | -                      |
| O $\gamma$ -Thr203                                 | O $\eta$ -Tyr66                                    | -                      | 2.672(6)              | -                      |

<sup>†</sup> Values in parentheses are estimated standard deviations derived from the full-matrix least squares refinement.<sup>‡</sup> These values are for the major of the alternative conformations.

**Table S5**Properties of H-bonding<sup>†</sup> around the chromophore.

| H-Donor                 | Acceptor                | $d_{D-A}$<br>(Å) | $d_{H-A}$<br>(Å) | $\rho_{BCP}$<br>(e Å <sup>-3</sup> ) | $\nabla^2\rho_{BCP}$<br>(e Å <sup>-3</sup> ) | $D_e$<br>(kJ mol <sup>-1</sup> ) |
|-------------------------|-------------------------|------------------|------------------|--------------------------------------|----------------------------------------------|----------------------------------|
| Wat3                    | O <sub>η</sub> -Tyr66   | 2.727(7)         | 1.77(10)         | 0.188                                | 4.20                                         | 38.8                             |
| N <sub>δ1</sub> -His148 | O <sub>η</sub> -Tyr66   | 2.867(7)         | 1.91(6)          | 0.180                                | 2.64                                         | 30.1                             |
| C <sub>ε2</sub> -Tyr145 | O <sub>η</sub> -Tyr66   | 3.517(9)         | 2.44(8)          | 0.026                                | 0.97                                         | 5.1                              |
| N <sub>η2</sub> -Arg96  | O <sub>2</sub> -Tyr66   | 2.760(6)         | 1.85(8)          | 0.168                                | 3.27                                         | 30.8                             |
| N <sub>ε2</sub> -Gln94  | O <sub>2</sub> -Tyr66   | 2.940(7)         | 2.00(9)          | 0.094                                | 2.40                                         | 17.0                             |
| C <sub>γ</sub> -Gln69   | O <sub>2</sub> -Tyr66   | 3.369(7)         | 2.61(7)          | 0.046                                | 0.68                                         | 4.9                              |
| O <sub>γ1</sub> -Ser65  | O <sub>ε1</sub> -Gln222 | 2.742(7)         | 1.83(8)          | 0.160                                | 2.86                                         | 27.8                             |
| C <sub>δ1</sub> -Tyr66  | N <sub>2</sub> -Tyr66   | 3.113(7)         | 2.37(6)          | 0.089                                | 1.22                                         | 11.1                             |

<sup>†</sup>The bonding is defined based on AIM theory. A critical point where  $\nabla\rho_{BCP}=0$  and  $\rho_{BCP}>0$  should be detected between a donor and an acceptor.

<sup>‡</sup>Values in parentheses are estimated standard deviations derived from the full-matrix least squares refinement.
